# Supplementary material
Source: publisher site journal article supplement (https://www.dovepress.com/get_supplementary_file.php?f=341172.xlsx)
Supplement: Supplementary file 1 [file get_supplementary_file.php]

## Sheet: Table S1
Supplementary Table S1: Clinical phenotype of patients with TWNK mutations in PRLTS5
	Family	I		II		III			IV	V		VI			VII	VIII	IX	X		XI	XII	12 family(20 patients)
	Gender	F	F	F	F	F	F	F	F	F	F	F	F	M	F	F	F	F	M	F	F	female/male:18:2
	Diagnosed age(ys)	40	34	41	36	NA	NA	NA	48	27	19	43	43	29	29	33	27	8	6	58	11	6-58 years
	karyotype	46,XX	46,XX	46,XX	46,XX	NA	NA	NA	NA	46,XX	46,XX	NA	NA	NA	46,XX	46,XX	46,XX	NA	NA	NA	46,XX	46,XX
Ears	SNLH	Yes	Yes	Yes	Yes	Yes	Yes	Yes	Yes	Yes	Yes	Yes	Yes	Yes	Yes	Yes	Yes	Yes	Yes	Yes	Yes	20/20(100%)
Endocrine	Ovarian dysfunction	Yes	Yes	Yes	Yes	Yes	Yes	Yes	Yes	Yes	Yes	Yes	Yes	Yes,dysfunction of the gonadal axis	Yes	Yes	Yes	NA	NA	NA	Yes	17/20(85%)
	Lack of secondary sexual characteristics	Yes	Yes														Yes					3/20(15%)
	Hypergonadotropinemia	Yes	Yes						Yes	Yes	Yes					Yes					Yes	7/20(35%)
	Primary amenorrhea	Yes	Yes	Yes	Yes	Yes	Yes	Yes	Yes	Yes	Yes	NO	NO	NO	Yes	Yes	Yes	NO	NO	NO	Yes	14/20(70%)
	POI	NO	NO	NO	NO	NO	NO	NO	NO	NO	NO	20	32	NO	NO	NO	NO	NO	NO	NO	NO	2/20(10%)
	Gonadal dysgenesis(Pelvic ultrasound)	NA	NA	streak ovaries	streak ovaries	NA	NA	NA	Small uterus and ovaries	streak gonads, rudimentary uterus	NA	NA	NA	NA	NA	NA	normal-sized anteverted uterus and small ovaries	NA	NA	NA	Small uterus and ovaries	6/20(30%)
	Thyroid dysfunction	NA	NA	NA	NA	NA	NA	NA	NA	Hashimoto,diagnosed at age 16	Hashimoto,diagnosed at age 16	NA	autoimmune hypothyroidism secondary to Hashimoto thyroiditis	autoimmune hypothyroidism	NA	NA	NA	NA	NA	NA	NO	4/20(20%)
Peripheral Nervous System	peripheral neuropathy	Yes	Yes	Yes onset after age 20	Yes	Yes	Yes	Yes	Yes	Yes onset at age 3	Yes onset at age 11	Yes	Yes	Yes	Yes	Yes	Yes onset at age 26	NA	NA	Yes	Yes	18/20(90%)
	Electrophysiological abnormalities	Sensory axonal neuropathy	Sensory axonal neuropathy	Axonal neuropathy	NA	sensory-motor polyneuropathy	sensory-motor polyneuropathy	sensory-motor polyneuropathy	sensory-motor neuropathy	axonal sensory-motor polyneuropathy	axonal sensory-motor polyneuropathy	NA	demyelinating sensitive polyneuropathy	mixed sensitive and motor demyelinating and axonal polyneuropathy.Neurophysiologic studies found a dysfunction of somatosensory pathway in the posterior spinal cord and bulbo-cortical lemniscus.	Sensory demyelinating polyneuropathy	mixed type neuropathy：axonal type neuropathy+slight signs of demyelinating	axonal sensory-motor peripheral neuropathy (predominantly sensory)	NA	NA	NA	NA	14/20(70%)
	Deep tendon reflex of UL	NA	NA	NA	diminished	NA	NA	NA	Absent	Diminished	Diminished	Absent	Absent	Absent	Absent	increased	Diminished	Normal	Normal	diminished	Absent	12/20(60%)
	Deep tendon reflex of LL	diminished	diminished	diminished	diminished	NA	NA	NA	Absent	Absent	Absent	Absent	Absent	Absent	Absent	increased	Absent	Normal	Normal	diminished	Absent	15/20(75%)
	Other	hypoesthesia of temperature and vibration	hypoesthesia of temperature and vibration	reduced sensitivity to vibration								Touch and arthrokinetic sensitivity were diminished in lower limbs with a distal gradient,there was also an impairment of arthrokinetic sensitivity in upper limbs.	loss of arthrokinetic sensitivity in the feet, which were cavus.	loss of arthrokinetic sensitivity in the feet, which were cavus.	The vibration sense and joint position sense of the tuning fork of both lower limbs were decreased	Slight distal type sensory deficit UL LL;	distal hypoesthesia LL			numbness in her distal extremities at age 57
Central Nervous System	Brain/cervical spine MRI	Normal	Normal	nonspecific white matter changes	nonspecific white matter changes	NA	NA	NA	severe atrophy of the cerebellum and atrophy of the cervical medulla	cochlear and vestibular nerves partial atrophy,cerebellar atrophy	cochlear and vestibular nerves partial atrophy	thinning of the spinal cord, cerebellar atrophy and signal changes in the cerebellar white matter	global cerebellar atrophy and signal changes in the cerebellar white matter	cervical kyphosis, flattening of the spinal cord and cerebellar atrophy	cervical kypspinal cord and cerebellar atrophy	enlarged 4th ventricle,Medulla oblongata,cervical spinal cord, and cerebellar atrophy	NA	No	No	mild cerebellar atrophy	NA	13/20(65%)
	ataxia	Yes beginning at age 20	Yes beginning at age 16	Yes developed as a teenager	Yes	Yes	Yes	Yes	Yes<3	Yes	Yes	Yes	Yes	Yes	Yes	Yes	Yes	Yes 4	Yes 4	Yes	Yes	20/20(100%)
	Romberg’s sign	Positive	Positive	Positive	NA	NA	NA	NA	NA	Positive	Positive	Positive	Positive	Positive	NA	NA	Positive	NA	NA	Positive	Positive	11/20(55%)
	Other	SPECT:hypoperfusion of the cerebellum	SPECT:hypoperfusion of the cerebellum	Tonic-clonic Seizures at age 7											pyramidal signs:left side(+)	pyramidal signs:bilateral(+);EEG mild cortical dysfunction
Musculoskeletal	Muscle weakness	NA	NA	NA	NA	NA	NA	NA	NA	Yes UL < LL	Yes UL < LL	NA	NA	NA	Yes UL:V-~V,LL:IV	Yes LL	NO	NA	NA	NA	NO	4/20(20%)
	Muscle atrophy	NA	NA	Yes distal atrophy of the hands and feet	NA	NA	NA	NA	NA	Yes UL < LL	Yes UL < LL	Yes mild atrophy in the four limbs	NA	NA	Yes	Yes	NO	NA	NA	NA	NO	6/20(30%)
	Motor Dysfunction	mild movement abnormalities of upper and lower extremities	mild movement abnormalities of upper and lower extremities	NA	NA	NA	NA	NA	wheelchair	unable to run since the age of 15 years	NA	difficulties with walking at 35	NA	NA	needs support to walk	wheelchair	NA	NA	NA	NA	NA	7/20(35%)
	pes cavus	Yes	Yes	NA	NA	NA	NA	NA	NA	Yes	Yes	Yes	Yes	Yes	Yes	Yes	Yes	NA	NA	NA	NA	10/20(50%)
	high-arched palate	Yes	Yes	NA	NA	NA	NA	NA	NA	Yes	Yes	NA	NA	NA	NA	NA	NA	NA	NA	NA	Yes	5/20(25%)
	Other	NA	NA	NA	NA	Arachnodactyly	Arachnodactyly	Arachnodactyly	Scoliosis	clawed toes	clawed toes				clubbed-finger,Muscular tension Diminished		hammertoes	Scoliosis,wide set eyes,protruding ears,Muscular tension increased	wide set eyes,protruding ears,Muscular tension increased
Eyes	nystagmus	Yes	Yes	Yes horizontal and vertical	Yes	NA	NA	NA	Yes	Yes horizontal	Yes horizontal and vertical	Yes horizontal and vertical	NA	Yes horizontal and vertical	Yes horizontal	Yes horizontal	Yes	NA	NA	Yes dignosed at age 58	Yes horizontal	14/20(70%)
	Ophthalmoplegia	Yes	Yes	NA	NA	NA	NA	NA	Yes	Yes	Yes	NA	NA	NA	NA	NA	NO	NA	Yes,The left eyeball cannot be abducted, and both sides have esotropia	NA	NA	6/20(30%)
Development	intellectual disability	NA	NA	NA	NA	NA	NA	NA	normal or slightly below average	No	No	NA	NA	NA	NA	NO	NO	IQ 62	IQ 72	NA	No	3/20(15%)
	Dysarthria	NA	NA	NA	NA	NA	NA	NA	NA	Yes	Yes	Yes	Yes	NA	Yes	Yes	NA	Yes	Yes	Yes	NO	9/20(45%)
	Other									Cerebellar syndrome	Cerebellar syndrome	global hypotony	vitiligo and increase of liver enzymes,global hypotony			progressive hypoacusis;myalgia;proximal spastic paraparesis in the lower limbs;moderate depression, anxiety, querulous behavior and paranoid personality traits
Abbreviations: F, female; M, male; NA, not available; SNHL, sensory neural hearing loss; POI:primary ovarian insufficiency; UL:upper limbs;LL:lower limbs
